# Supplementary material
Source: publisher figshare collection journal article supplement (https://acs.figshare.com/ndownloader/files/13675595)
Supplement: Supplementary file 1 [file 13675595]

## Supporting information

### **Electrostatic-Driven Activity, Loading, Dynamics and Stability of a Redox Enzyme on Functionalized-Gold Electrodes for Bioelectrocatalysis**

Vivek Pratap Hitaishi,<sup>[a]</sup> Ievgen Mazurenko,<sup>[b]</sup> Malek Harb,<sup>[a]</sup> Romain Clément,<sup>[a]</sup>  
Marion Taris,<sup>[c]</sup> Sabine Castano,<sup>[c]</sup> David Duché,<sup>[d]</sup> Sophie Lecomte,<sup>[c]</sup> Marianne  
Ilbert,<sup>[a]</sup> Anne de Poulpiquet,<sup>[a]</sup> Elisabeth Lojou\*<sup>[a]</sup>

<sup>[a]</sup> Aix-Marseille Univ, CNRS, BIP, UMR 7281, 31 Chemin Aiguier, 13009 Marseille, France

<sup>[b]</sup> School of Biomedical Sciences, University of Leeds, LS2 9JT Leeds, UK

<sup>[c]</sup> Institute for Chemistry and Biology of Membrane and Nano-objects, Allée Geoffroy St Hilaire,  
33600 Pessac, France

<sup>[d]</sup> Aix Marseille Univ, CNRS, University of Toulon, IM2NP UMR 7334, 13397 Marseille, France

\*Corresponding author: [lojou@imm.cnrs.fr](mailto:lojou@imm.cnrs.fr)

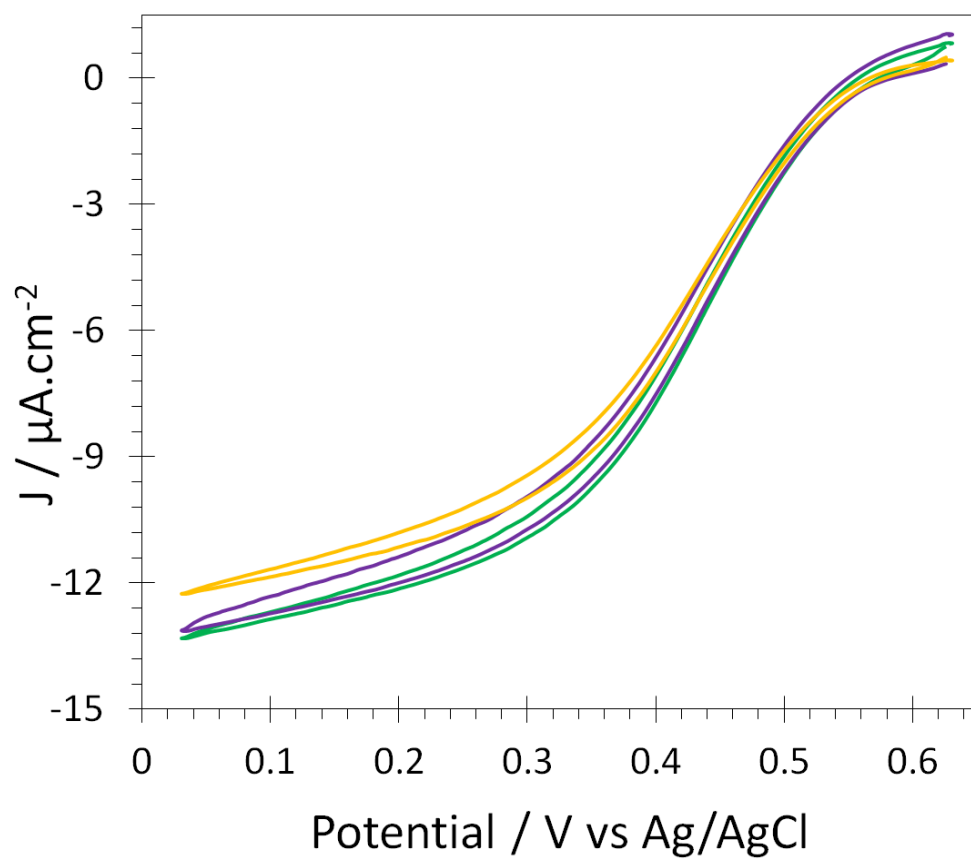

**Figure S1** : CVs showing catalytic responses at pH 6 at different scan rates: 5  $\text{mV}\cdot\text{s}^{-1}$  (green), 10  $\text{mV}\cdot\text{s}^{-1}$  (purple), 2  $\text{mV}\cdot\text{s}^{-1}$  (yellow) with *Mv* BOD adsorbed at pH 6 on 6-MHA-SAM.

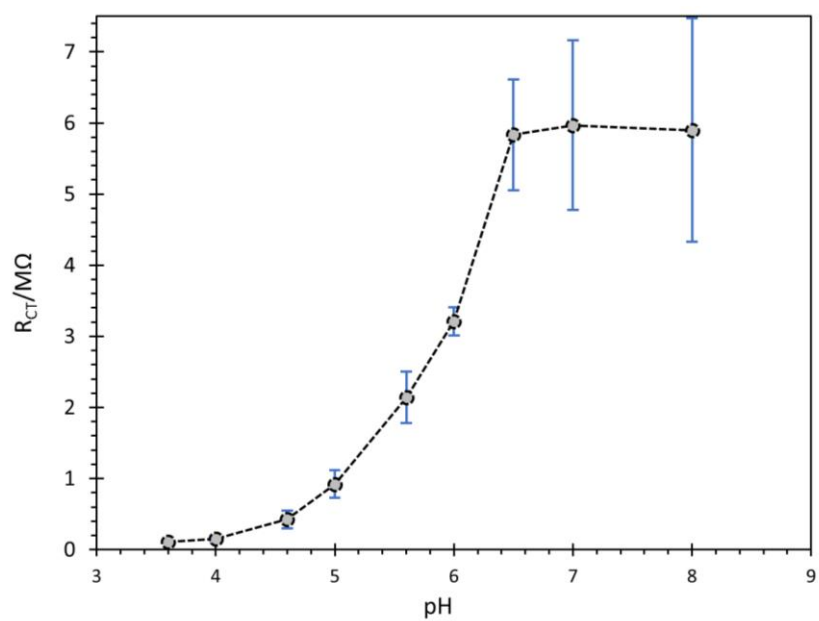

**Figure S2: Determination of the pKa of 6-MHA-SAM.** Determination of the pKa of 6-MHA-SAM by impedance spectroscopy: charge transfer resistance ( $R_{CT}$ ) was measured in the presence of 1 mM  $Fe(CN)_6^{3-/4-}$  in various pH solutions.

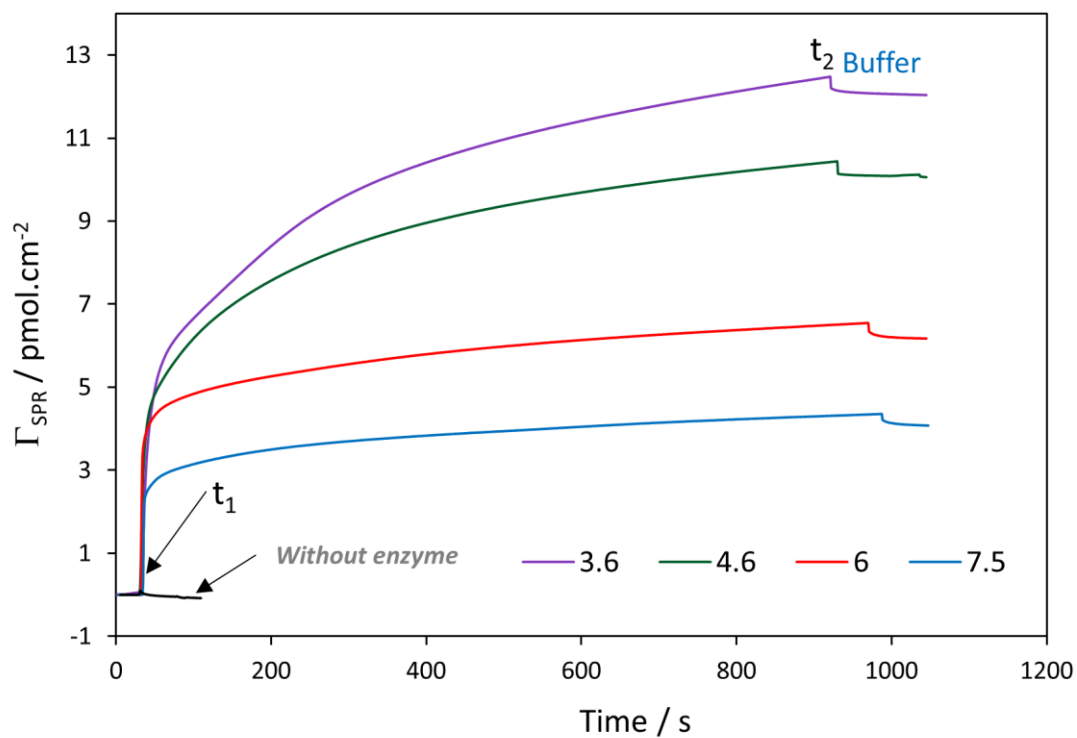

**Figure S3. SPR determination of enzyme coverage as a function of pH.** SPR measurement of *Mv* BOD adsorption on SPR chip modified by MHA-SAM in 100 mM air-saturated phosphate/phosphate-citrate buffer at desired pHs for 15 min at RT. 20  $\mu\text{M}$  *Mv* BOD was injected at  $t_1$ , and the chip was rinsed with buffer at  $t_2$ .

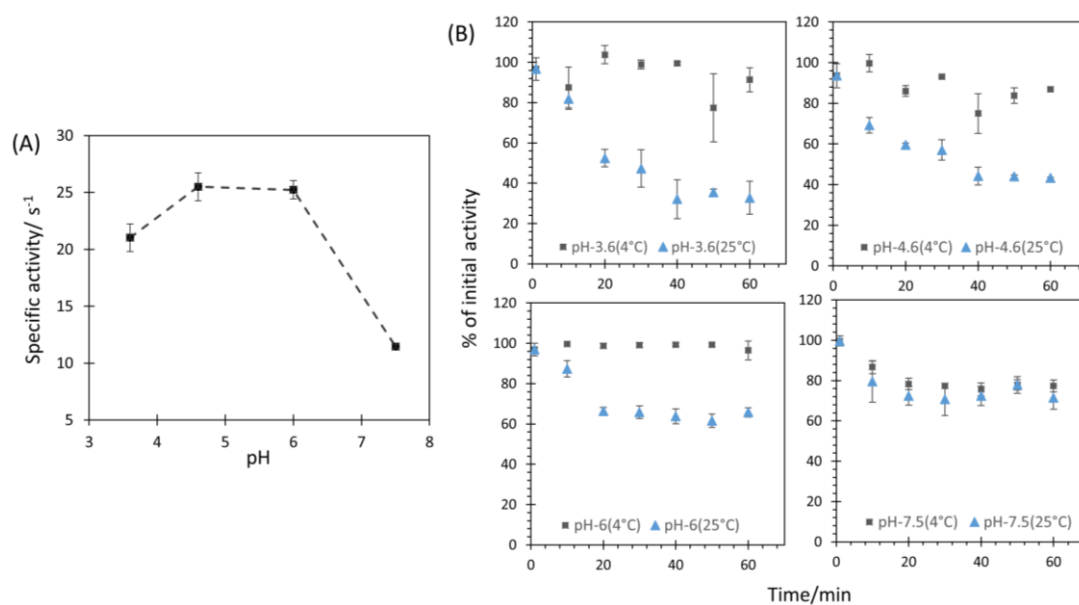

**Figure S4. Comparative stability of the homogeneous activity at RT or 4°C as a function of pH.** (A) Homogeneous activity of freshly prepared *Mv* BOD solution as a function of pH; (B) Remaining homogeneous activity as a function of pH, T° and time (in % of the initial activity).

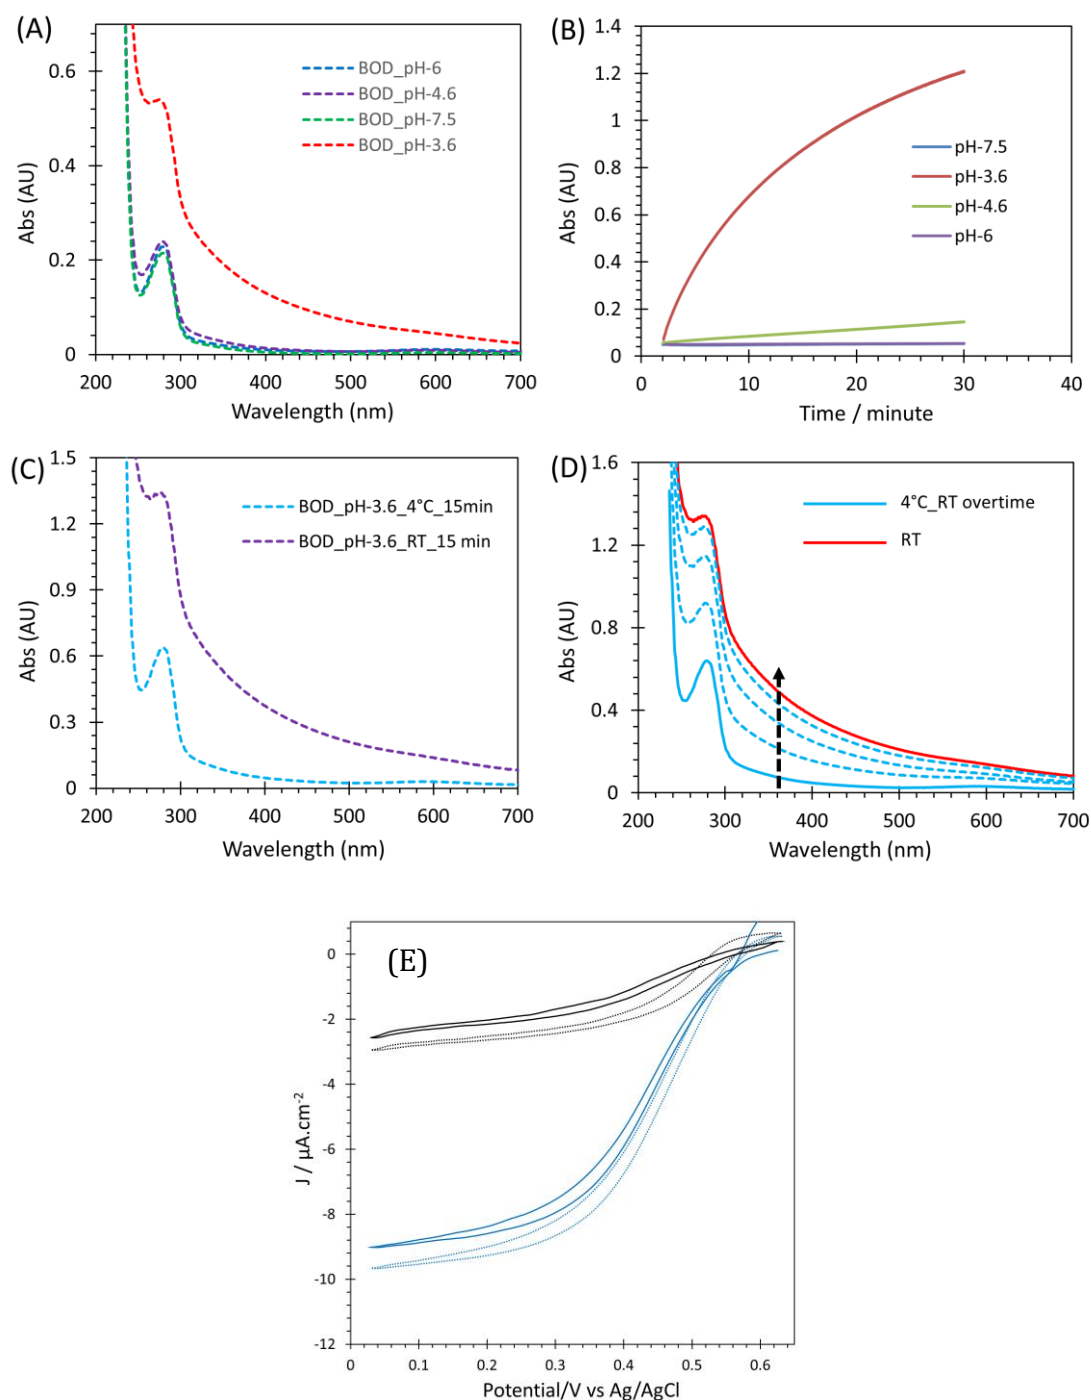

**Figure S5. Temperature and pH dependency of *Mv* BOD aggregation.** (A) UV-Vis spectra of 20  $\mu\text{M}$  *Mv* BOD incubated 15 min in different pH buffers at RT; (B) Kinetics of aggregation of 20  $\mu\text{M}$  *Mv* BOD at RT measured by UV-absorption at 360 nm in different buffer; (C) UV-Vis spectra of 20  $\mu\text{M}$  *Mv* BOD incubated 15 min at

pH 3.6 either at room temperature (RT) or at 4°C; (D) After more than 5 hours of incubation of 20  $\mu$ M *Mv* BOD at 4°C and pH 3.6, aggregation of BOD can be followed overtime as soon as proteins are incubated at RT. Each blue dotted curve represents a spectrum measured for increasing times (5, 10, 15 min); (E) CVs of O<sub>2</sub> reduction at pH 6 by 20  $\mu$ M *Mv* BOD adsorbed for 15 min on 6-MHA-SAM at pH 3.6 either at 4°C (black curves) or at RT (blue curves). Dotted lines are obtained after 50  $\mu$ M ABTS addition in solution.

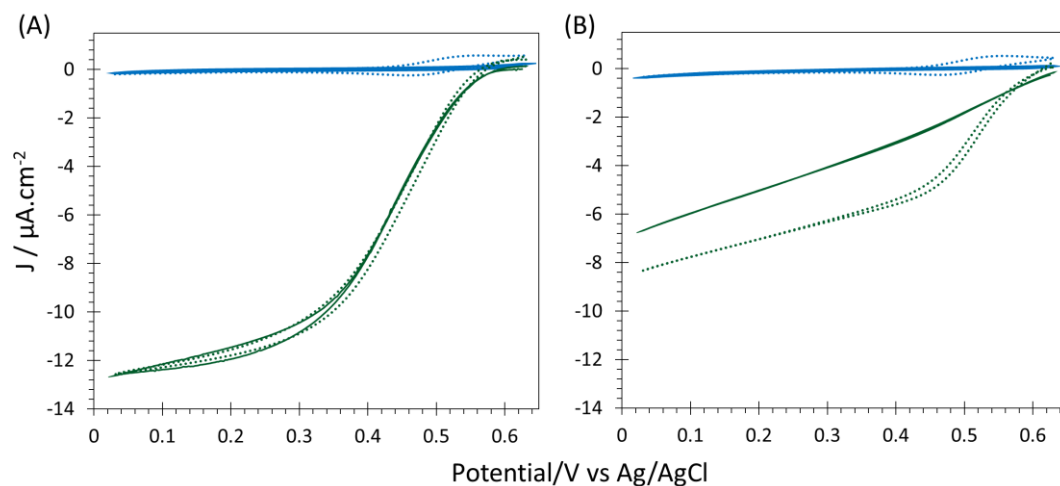

**Figure S6. Control experiments on 6-MHA-SAMs using unfolded  $M_v$  BOD.**

Catalytic responses at (A) pH 6 or (B) pH 3.6 while  $M_v$  BOD was heated at 100°C during 15 min in the presence (blue solid) or absence (green solid) of 8 M urea and adsorbed at pH 6 on 6-MHA SAM. Dotted curves represent the corresponding MET signal after the addition of 50  $\mu$ M ABTS in the electrolyte. Scan rate  $v = 5 \text{ mV.s}^{-1}$ .



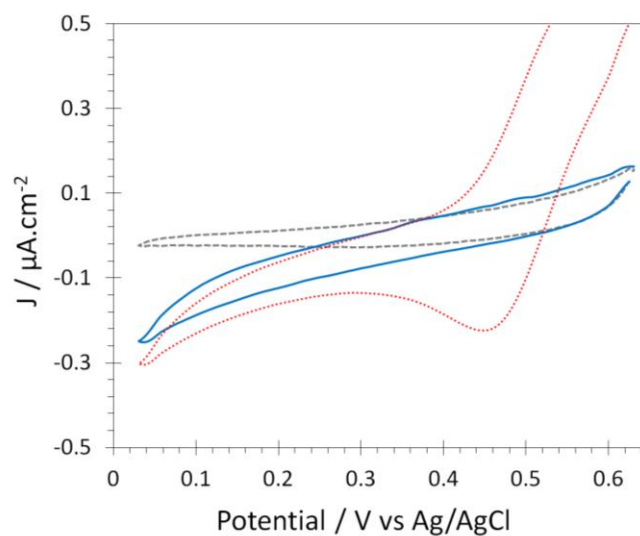

**Figure S7. Control experiments on 6-MHA-SAMs using denatured *Mv* BOD.**

Catalytic responses at pH 6 with *Mv* BOD adsorbed at pH 6 on 6-MHA SAM after heating the enzyme sample at 100°C for 20 minutes (blue solid). Dotted red curve represents the corresponding MET signal after the addition of 50  $\mu\text{M}$  ABTS in electrolyte, and dotted grey curve corresponds to the SAM. Scan rate  $v = 5 \text{ mV.s}^{-1}$

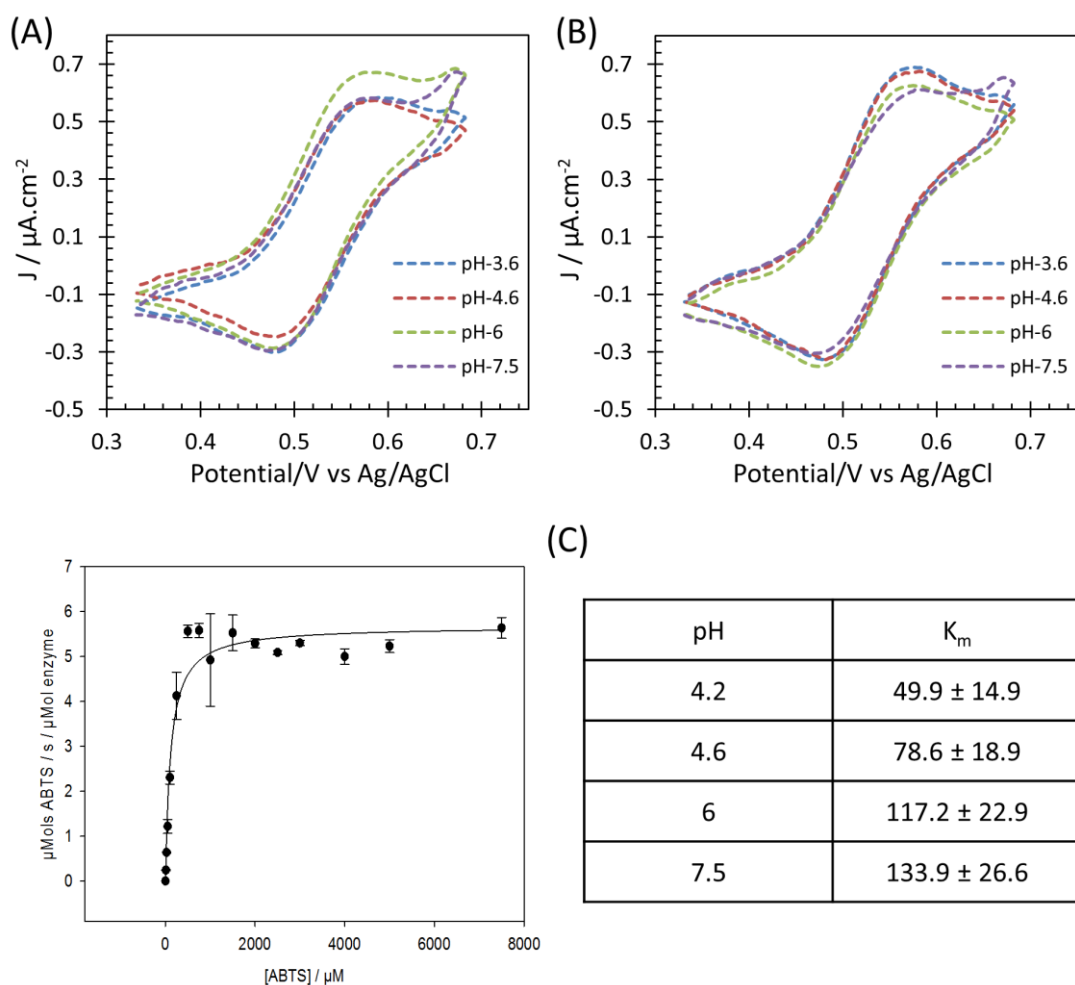

**Figure S8. Electrochemical behavior of ABTS and Michaelis-Menten ( $K_m$ ) constant determination.** CVs of 50  $\mu\text{M}$  ABTS as a function of pH on (A) 6-MHA-SAM and (B) 4-ATP-SAM under  $\text{N}_2$  atm. CV are recorded at  $25^\circ\text{C}$  and  $v = 5 \text{ mV} \cdot \text{s}^{-1}$ . (C)  $K_m$  determination for 300 nM *Mv* BOD as a function of pH (graph provided for pH 6) in the presence of ABTS.

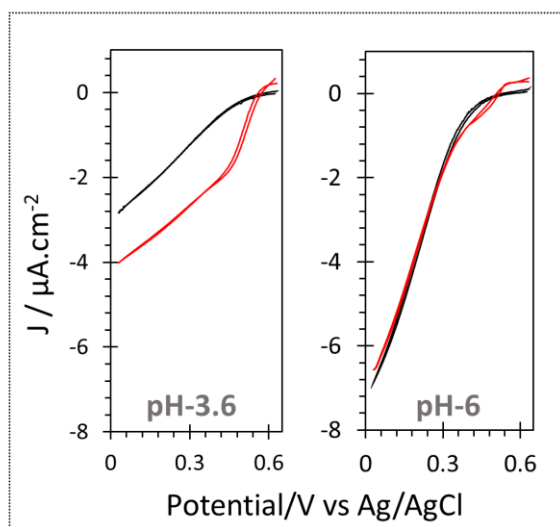

**Figure S9. Electrocatalysis on 11-MUA.** Catalytic  $O_2$  reduction in different pH buffers by *Mv* BOD adsorbed at pH 6 for 15 min at  $4^\circ\text{C}$  on 11-MUA-SAM. Black curves and red curves are obtained before and after  $50\ \mu\text{M}$  ABTS in solution, respectively.  $v = 5\ \text{mV.s}^{-1}$ .

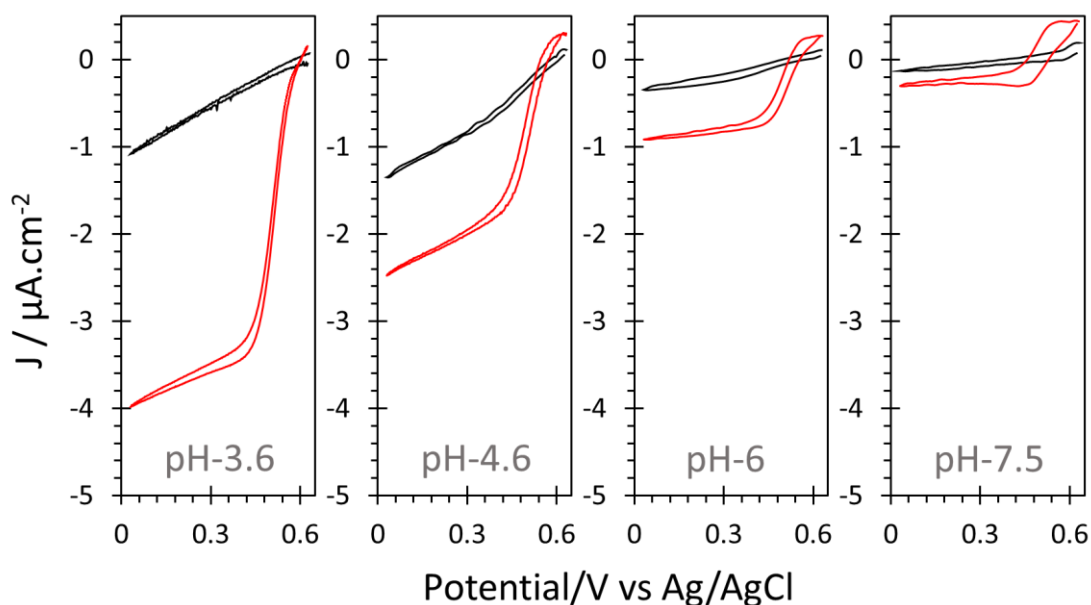

**Figure S10. Electrocatalysis on butanethiol (BT).** Catalytic  $O_2$  reduction in different pH buffers by *Mv* BOD adsorbed at pH 6 for 15 min at  $4^\circ\text{C}$  on BT-SAM. Black curves and red curves are obtained before and after  $50\ \mu\text{M}$  ABTS in solution, respectively.  $v = 5\ \text{mV.s}^{-1}$ .

Hydrophobic surfaces were also studied to validate the orientation model. On the hydrophobic BT-SAM, *Mv* BOD is able to be adsorbed, leading to coverage of  $11.2 \pm 0.4$ ,  $6.5 \pm 0.4$ , and  $5.7 \pm 0.3$  at pH 3.6, 4.6, and 6, respectively (See Table S1). The surrounding of the CuT1 in *Mv* BOD was shown to be more hydrophilic than hydrophobic<sup>2</sup>. As a consequence, adsorption of *Mv* BOD on the hydrophobic BT-SAM at pH 6 mainly yielded a MET signal to be observed with values of 4, 2.5 and  $0.9\ \mu\text{A.cm}^{-2}$  at pH 3.6, 4.6 and 6 respectively. At pH 7.5, the redox signal of ABTS alone mainly contributes to the electrochemical signal as a result of the very low activity of the enzyme.

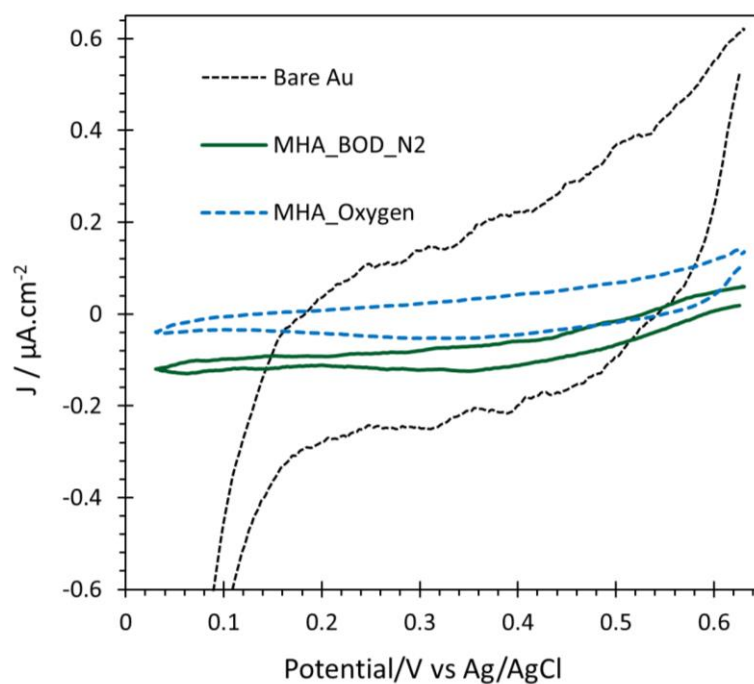

**Figure S11. Control experiments on 6-MHA-SAMs.** CV for 6-MHA-SAM modified (blue dotted) gold electrode under O<sub>2</sub> atm. CVs for unmodified (black dotted), and for 6-MHA-SAM/*M<sub>v</sub>* BOD modified (green solid) gold electrode under N<sub>2</sub> atm. BOD adsorption is made at 4°C for 15 min at pH 6 and electrochemistry is made at 25°C in pH 6 buffer. Scan rate  $\nu = 5 \text{ mV.s}^{-1}$ .

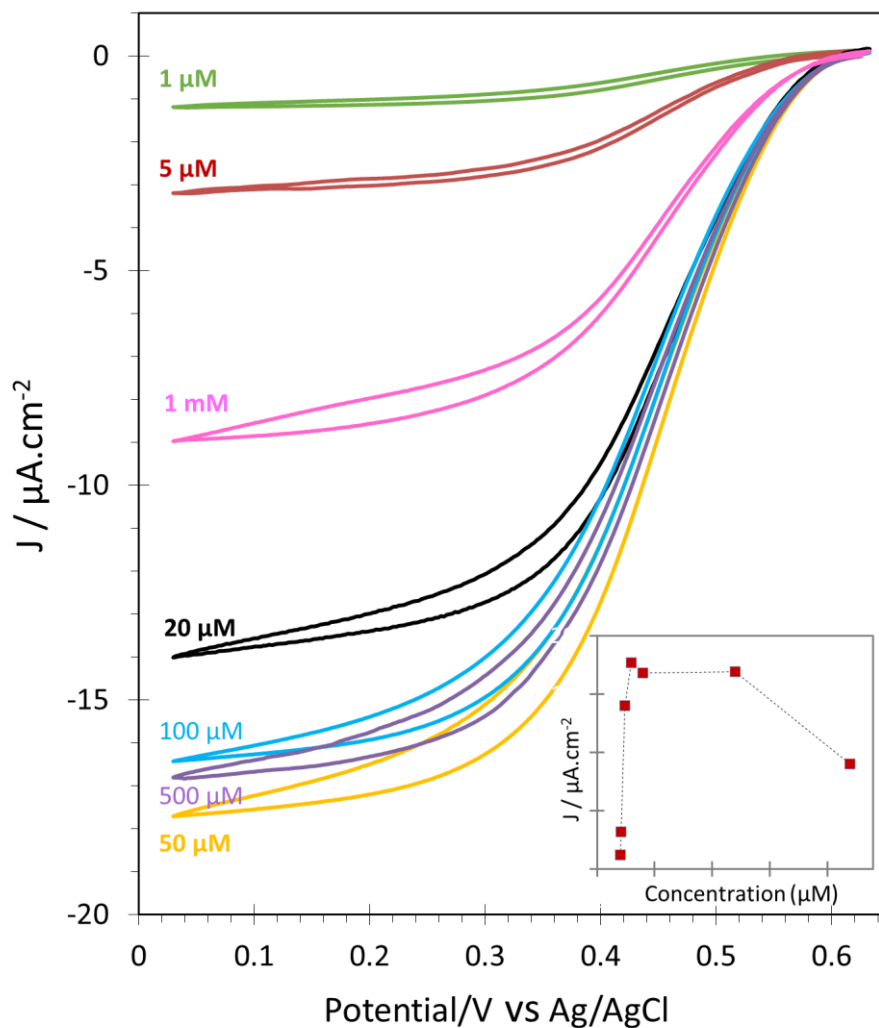

**Figure S12: Effect of *Mv* BOD concentration on the electrocatalytic activity at pH 6.**

*Mv* BOD concentration used for the initial adsorption step on 6-MHA-SAM is one of the parameters expected to influence the catalysis. As shown in Figure S12, the direct catalytic current for  $\text{O}_2$  reduction first increased with the enzyme concentration to reach a plateau at a concentration around 50  $\mu\text{M}$ . At concentrations higher than 600  $\mu\text{M}$ , the current tends to more drastically decrease.

The amount of *Mv* BOD adsorbed on 6-MHA-SAM was quantified by SPR using the same range of *Mv* BOD concentrations as for electrocatalysis. The corresponding enzyme coverage is given in the following table (Table S2).



**Table S1.** SPR data for different pH of adsorption of *Mv* BOD on BT, and values of the ratio DET/DET+MET at different pHs. Catalytic currents are measured at 120 mV.

| pH of ads. | BT                                          |                                     |        |      |
|------------|---------------------------------------------|-------------------------------------|--------|------|
|            | $\Gamma_{\text{SPR}} / \text{pmol.cm}^{-2}$ | $I_{\text{DET}}/I_{\text{DET+MET}}$ |        |      |
|            |                                             | pH 3.6                              | pH 4.6 | pH 6 |
| 3.6        | $11.2 \pm 0.4$                              | -                                   | -      | -    |
| 4.6        | $6.5 \pm 0.4$                               | -                                   | -      | -    |
| 6          | $5.7 \pm 0.3$                               | 0.24                                | 0.48   | 0.34 |



**Table S2. Relationship between enzyme coverage on 6-MHA-SAM and electroactivity for O<sub>2</sub> reduction.** Enzyme coverage is obtained from SPR measurements at pH 6 and RT. Catalytic currents are measured at 0 V vs Ag/AgCl from Figure S12.

| <i>Mv</i> BOD concentration / $\mu\text{M}$ | $\Gamma_{\text{SPR}}$ / $\text{pmol.cm}^{-2}$ | Current density, <i>J</i> at 0 V vs Ag/AgCl / $\mu\text{A. cm}^{-2}$ | $I / \Gamma_{\text{SPR}}$ / $\mu\text{A.pmol}^{-1}$ |
|---------------------------------------------|-----------------------------------------------|----------------------------------------------------------------------|-----------------------------------------------------|
| 1                                           | $3.4 \pm 0.5$                                 | 1.2                                                                  | 0.35                                                |
| 5                                           | $5.3 \pm 0.8$                                 | 3.2                                                                  | 0.60                                                |
| 20                                          | $6.3 \pm 0.9$                                 | 14                                                                   | 2.22                                                |
| 50                                          | $8.2 \pm 1.1$                                 | 17.7                                                                 | 2.16                                                |
| 100                                         | $7.7 \pm 1.1$                                 | 16.8                                                                 | 2.18                                                |
| 500                                         | $8.2 \pm 1.2$                                 | 16.9                                                                 | 2.05                                                |
| 1000                                        | $9.5 \pm 1.3$                                 | 9.0                                                                  | 0.95                                                |

The amount of total protein adsorbed shows the same tendency as the catalytic current with increasing *Mv* BOD concentrations, reaching a plateau around 50  $\mu\text{M}$ . Considering that a theoretical monolayer of *Mv* BOD should be between 4.6 and 10.4  $\text{pmol.cm}^{-2}$  depending on the conformation the enzyme takes upon immobilization (*Mv* BOD dimensions are  $4 \times 5 \times 6 \text{ nm}^3$ )<sup>3</sup>, SPR data show that less than one monolayer is obtained for the lowest concentration ( $3.4 \text{ pmol.cm}^{-2}$  for 1  $\mu\text{M}$ ). For the other concentrations, either more than one layer is formed, or a different conformation is taken by the BOD upon immobilization.

Ellipsometry conducted on 20  $\mu\text{M}$  *Mv* BOD adsorbed at pH 6 gave a thickness value of  $4.0 \pm 0.2 \text{ nm}$ . Taking into account the thickness of the 6-MHA-SAM ( $0.7 \pm 0.05 \text{ nm}$ )

also measured by ellipsometry, this means that the enzyme layer thickness takes a value of  $3.3 \pm 0.2$  nm. This suggests that the enzyme maintains its conformation at pH 6 at the SAM electrode, contrary to what was previously observed on bare gold where a low thickness value of 1.7 nm was obtained by ellipsometry <sup>3</sup>. The value of the catalytic current was reported to the enzyme coverage (Table S2), allowing to discuss the effect of enzyme concentration on the catalytic activity. This so-called specific activity increases up to 50  $\mu$ M and remains constant till 500  $\mu$ M, before decreasing for the higher enzyme concentrations. This tendency is in agreement with the QCM data reported by Blanford *et al.* which suggested that enzyme in low concentrations has time to relax and forms a more rigid adlayer displaying less activity <sup>4</sup>. At high enzyme concentrations, steric hindrance between immobilized proteins might be one explanation for the decrease in specific electrocatalytic activity.

**Table S3. Electroactivity loss with time as a function of applied potential at different pH.** % loss of the electrochemical activity recorded by chronoamperometry at different pHs under variable fixed applied potential. *Mv* BOD was adsorbed at 4°C from pH 6 buffer for 15 min and transferred to different pHs for chronoamperometry measurement at 25°C in O<sub>2</sub>-saturated 100 mM phosphate/phosphate-citrate buffer.

| pH  | Activity loss % after 2700 s                   |                                                |
|-----|------------------------------------------------|------------------------------------------------|
|     | $E_{\text{appl}} = +0.13 \text{ V vs Ag/AgCl}$ | $E_{\text{appl}} = +0.53 \text{ V vs Ag/AgCl}$ |
| 6.5 | 10                                             | 20                                             |
| 6   | 2                                              | 20                                             |
| 5.5 | 5                                              | 25                                             |
| 4.6 | 0                                              | 6                                              |

## References

1. Smalley, J. F.; Feldberg, S. W.; Chidsey, C. E.; Linford, M. R.; Newton, M. D.; Liu, Y.-P., The kinetics of electron transfer through ferrocene-terminated alkanethiol monolayers on gold. *J. Phys. Chem.* **1995**, *99*, 13141-13149.
2. Climent, V.; Zhang, J.; Friis, E. P.; Ostergaard, L. H.; Ulstrup, J., Voltammetry and single-molecule in situ scanning tunneling microscopy of laccases and bilirubin oxidase in electrocatalytic dioxygen reduction on Au (111) single-crystal electrodes. *J. Phys. Chem. C* **2011**, *116*, 1232-1243.
3. Pankratov, D.; Sotres, J.; Barrantes, A.; Arnebrant, T.; Shleev, S., Interfacial behavior and activity of laccase and bilirubin oxidase on bare gold surfaces. *Langmuir* **2014**, *30*, 2943-2951.
4. McArdle, T.; McNamara, T. P.; Fei, F.; Singh, K.; Blanford, C. F., Optimizing the Mass-Specific Activity of Bilirubin Oxidase Adlayers through Combined Electrochemical Quartz Crystal Microbalance and Dual Polarization Interferometry Analyses. *ACS Appl. Mater. Interfaces* **2015**, *7*, 25270-25280.
